# Supplementary material
Source: publisher figshare collection journal article supplement (https://acs.figshare.com/ndownloader/files/34005927)
Supplement: Supplementary file 1 [file 34005927]

# Supporting Information

## Corrosion-resistant Graphene-based Magnetic Composite Foams for Efficient Electromagnetic Absorption

Shuangshuang Li <sup>a</sup>, Xinwei Tang <sup>a</sup>, Yawei Zhang <sup>a</sup>, Qianqian Lan <sup>a</sup>, Zhiwei Hu <sup>a</sup>, Le Li <sup>a</sup>, Nan Zhang <sup>a</sup>, Piming Ma <sup>a</sup>, Weifu Dong <sup>a</sup>, Wengweei Tjiu <sup>b</sup>, Zicheng Wang <sup>a,\*</sup>, Tianxi Liu <sup>a,\*</sup>

<sup>a</sup> The Key Laboratory of Synthetic and Biological Colloids, Ministry of Education, Institute of Nanocomposites and Energy Materials, School of Chemical and Material Engineering, Jiangnan University, 214122 Wuxi, Jiangsu, P. R. China

<sup>b</sup> Institute of Materials Research and Engineering, Agency for Science, Technology and Research (A\*STAR), 2 Fusionopolis Way, 138634, Singapore

\*Corresponding authors.

E-mail: wangzc@jiangnan.edu.cn (Z. C. Wang);

txliu@jiangnan.edu.cn (T. X. Liu)

**Synthesis of 4, 4'-bis (3, 4-dicyanophenoxy) biphenyl (BPH).** A mixture containing 4, 4'-biphenol (0.6 mol) and 4-nitrophthalonitrile (1.2 mol) in 600 mL of *N, N*-Dimethylformamide (DMF) was stirred at room temperature for 30 min. 1.3 mol anhydrous potassium carbonate ( $K_2CO_3$ ) was then added into the mixture in three portions at 1 h intervals. After being continuously stirred for 72 h at room temperature, the obtained mixture was slowly poured into 10 % aqueous hydrochloric acid solution (600 mL). The separated precipitate was isolated by suction filtration, washed with water until clear and neutral, and dried. Purification was realized by recrystallization from acetone-water to afford 95% of BPH.  $^1H$  NMR (ppm): 8.12-8.07, 7.83, 7.81-7.76, 7.45-7.40, 7.30-7.24; FTIR ( $cm^{-1}$ ): 3074, 3034, 3101, 2240, 1592, 1491, 1410, 959;  $T_m$ : 233 °C.

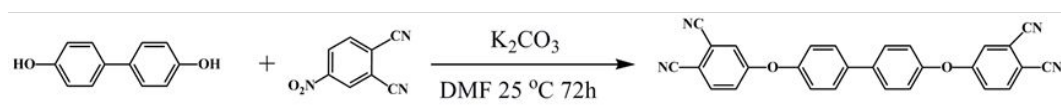

**Figure S1.** Synthesis of 4, 4'-bis (3, 4-dicyanophenoxy) biphenyl.

### Preparation of graphene-based magnetic composite foam

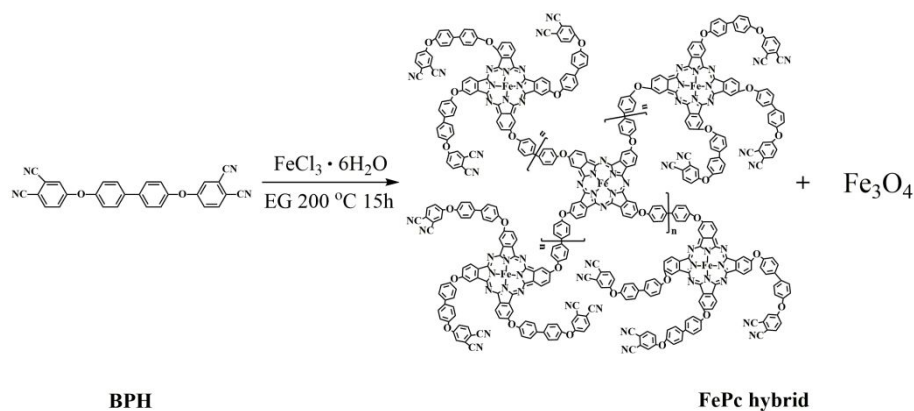

**Figure S2.** Synthetic illustration of FePc hybrid under solvothermal condition.

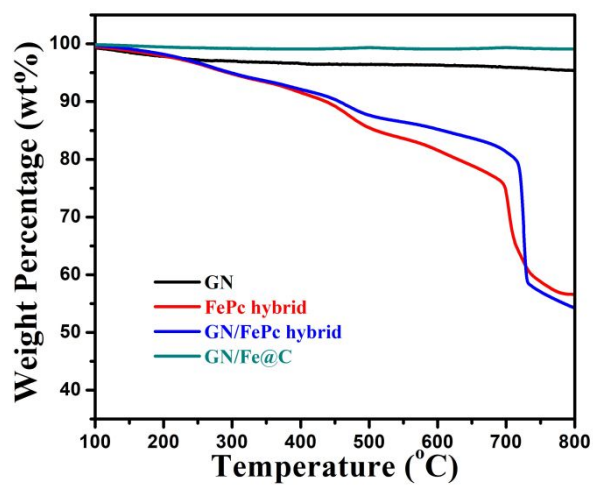

**Figure S3.** The thermogravimetric curves for GN, FePc hybrid, GN/FePc hybrid and GN/Fe@C foams.

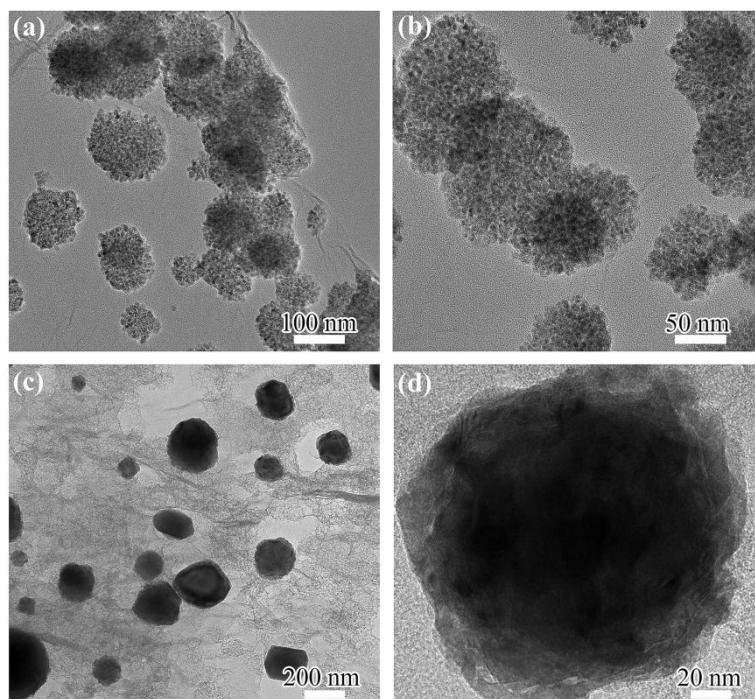

**Figure S4.** TEM images of (a, b) GN/FePc hybrid foam and (c, d) GN/Fe@C foam.

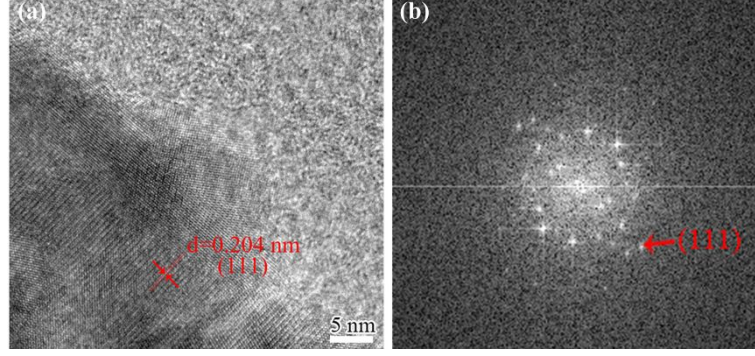

**Figure S5.** (a) HR-TEM images of shell in Fe@C; (b) the corresponding Fourier-transform diffraction patterns of the HR-TEM image.

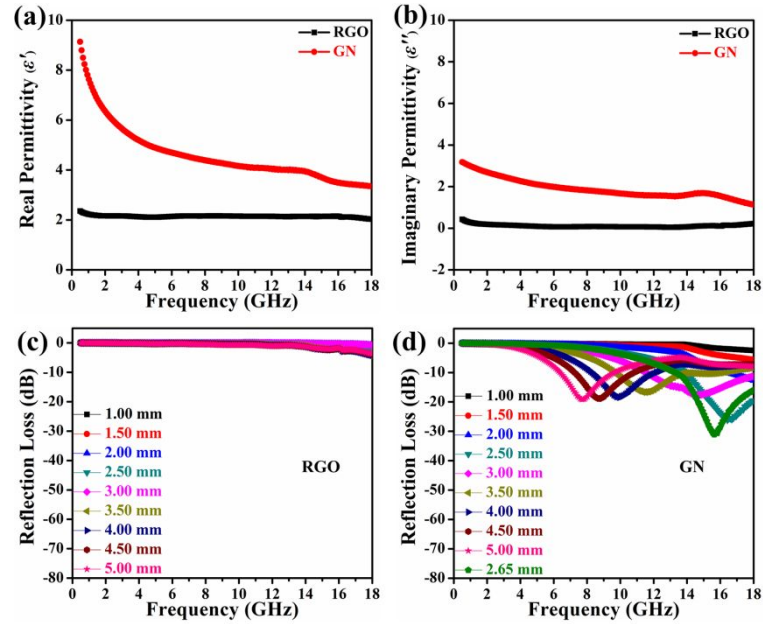

**Figure S6** The real parts (a) and (b) imaginary parts of complex permittivity of RGO and GN foams; 2D reflection loss maps of the (c) RGO and (d) GN foams with different thickness (1-5 mm) at 0.5-18 GHz.

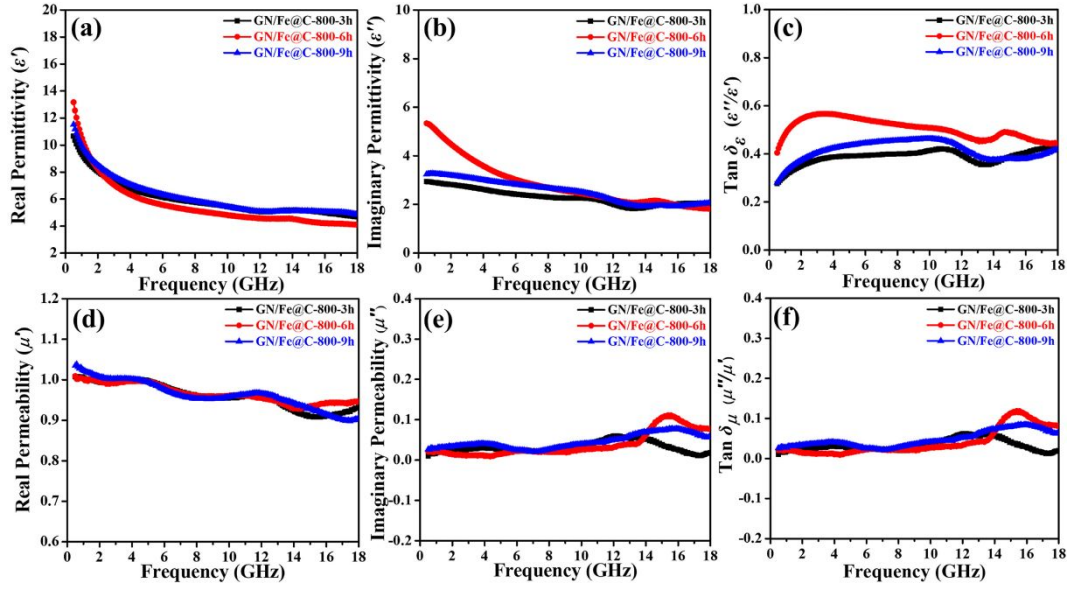

**Figure S7.** (a, d) the real parts, (b, e) imaginary parts, (c) dielectric loss tangent, and (f) magnetic loss tangent of complex permittivity and permeability for GN/Fe@C foams annealed at different times.

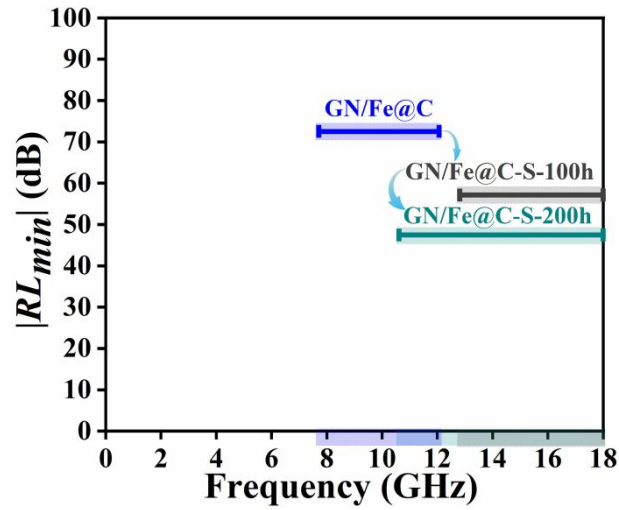

**Figure S8.** The summary of MA performance for the GN/Fe@C foams treated at different salt spray testing time.



**Table S1** Microwave absorption parameters of GN, GN/FePc hybrid and GN/Fe@C

|                 | GN          | GN/FePc hybrid | GN/Fe@C     |
|-----------------|-------------|----------------|-------------|
| $RL_{min}$      |             |                |             |
| $RL$ (dB)       | -31.40      | -27.24         | -72.46      |
| Frequency (GHz) | 15.64       | 17.82          | 9.33        |
| Thickness (mm)  | 3.15        | 2.40           | 3.85        |
| $EAB$ (GHz)     | 4.62        | 2.70           | 4.30        |
| Range (GHz)     | 13.38-18.00 | 15.30-18.00    | 7.68-12.00  |
| Band            | Ku          | Ku             | C, X        |
| $EAB_{max}$     |             |                |             |
| Thickness (mm)  | 2.65        | 4.00           | 2.80        |
| Bandwidth (GHz) | 6.42        | 4.00           | 6.36        |
| Range (GHz)     | 11.58-18.00 | 8.40-12.40     | 11.06-17.40 |
| Band            | X, Ku       | Ku             | X, Ku       |

**Table S2** Microwave absorption parameters of GN/FePc hybrid at different annealing temperature

|                 | GN/Fe@C-600 | GN/Fe@C-800 | GN/Fe@C-1000 |
|-----------------|-------------|-------------|--------------|
| $RL_{min}$      |             |             |              |
| $RL$ (dB)       | -46.05      | -72.46      | -19.17       |
| Frequency (GHz) | 14.06       | 9.33        | 4.34         |
| Thickness (mm)  | 2.23        | 3.85        | 1.84         |
| $EAB$ (GHz)     | 5.60        | 4.30        | 1.48         |
| Range (GHz)     | 12.40-18.00 | 7.68-12.00  | 3.77-5.25    |
| Band            | Ku          | C, X        | S, C         |

|             |                 |             |             |             |
|-------------|-----------------|-------------|-------------|-------------|
| $EAB_{max}$ | Thickness (mm)  | 2.45        | 2.80        | 5.00        |
|             | Bandwidth (GHz) | 6.20        | 6.36        | 5.10        |
|             | Range (GHz)     | 11.80-18.00 | 11.06-17.40 | 12.90-18.00 |
|             | Band            | X, Ku       | X, Ku       | Ku          |

---



**Table S3** Microwave absorption parameters of GN/FePc hybrid at different annealing time

|             |                 | GN/Fe@C-800-3h | GN/Fe@C-800-6h | GN/Fe@C-800-9h |
|-------------|-----------------|----------------|----------------|----------------|
| $RL_{min}$  | $RL$ (dB)       | -25.51         | -72.46         | -43.00         |
|             | Frequency (GHz) | 10.83          | 9.33           | 9.51           |
|             | Thickness (mm)  | 3.20           | 3.85           | 3.56           |
|             | $EAB$ (GHz)     | 4.12           | 4.30           | 4.35           |
|             | Range (GHz)     | 8.96-13.08     | 7.68-12.00     | 7.57-11.92     |
|             | Band            | X, Ku          | C, X           | C, X           |
| $EAB_{max}$ | Thickness (mm)  | 2.54           | 2.80           | 2.53           |
|             | Bandwidth (GHz) | 5.98           | 6.36           | 6.42           |
|             | Range (GHz)     | 11.62-17.60    | 11.06-17.40    | 11.58-18.00    |
|             | Band            | X, Ku          | X, Ku          | X, Ku          |

**Table S4** Microwave absorption parameters of GN/Fe@C after salt spray test in different time

|            |                 | GN/Fe@C    | GN/Fe@C-S-100h | GN/Fe@C-S-200h |
|------------|-----------------|------------|----------------|----------------|
| $RL_{min}$ | $RL$ (dB)       | -72.46     | -56.79         | -47.63         |
|            | Frequency (GHz) | 9.33       | 14.81          | 12.70          |
|            | Thickness (mm)  | 3.85       | 2.53           | 3.15           |
|            | $EAB$ (GHz)     | 4.30       | 5.20           | 7.38           |
|            | Range (GHz)     | 7.68-12.00 | 12.80-18.00    | 10.62-18.00    |
|            | Band            | C, X       | Ku             | X, Ku          |

|             |                 |             |             |            |
|-------------|-----------------|-------------|-------------|------------|
| $EAB_{max}$ | Thickness (mm)  | 2.80        | 2.97        | 3.38       |
|             | Bandwidth (GHz) | 6.36        | 7.34        | 10.12      |
|             | Range (GHz)     | 11.06-17.40 | 10.66-18.00 | 9.88-18.00 |
|             | Band            | X, Ku       | X, Ku       | X, Ku      |

---
